# Supplementary material
Source: HighWire-hosted journal article supplement (https://bmjopen.bmj.com/content/9/7/e024907)
Supplement: inline-supplementary-material-1 [file inline-supplementary-material-1.pdf]

Search Strategy Ovid MEDLINE(R) <1946 to June Week 2 2018>:  
-----

Pregnant / Breastfeeding Women

- 1 Pregnant Women/ (5226)
- 2 exp Breast Feeding/ (26666)
- 3 Milk, Human/ (15697)
- 4 Infectious Disease Transmission, Vertical/ (12256)
- 5 fetus/ (68631)
- 6 exp pregnancy/ (723003)
- 7 peripartum period/ (427)
- 8 exp Postpartum Period/ (49233)
- 9 exp pregnancy complications/ (345863)
- 10 exp Maternal Health Services/ (35913)
- 11 pregnan\*.mp,kw,kf. (778553)
- 12 gestat\*.tw,kw,kf. (144054)
- 13 breastfeed\*.mp,kw,kf. (13469)
- 14 (breast adj2 feed\*).mp,kw,kf. (30938)
- 15 (breast adj2 milk).mp,kw,kf. (8972)
- 16 breastmilk.tw,kw,kf. (683)
- 17 human milk.tw,kw,kf. (7840)
- 18 lactat\*.mp,kw,kf. (165010)
- 19 (milk adj2 eject\*).tw,kw,kf. (704)
- 20 (milk adj2 let\*-down).tw,kw,kf. (68)
- 21 ((expectant or expecting) adj2 wom#n).mp,kw,kf. (182)
- 22 parturit\*.tw,kw,kf. (11506)
- 23 birth\*.mp,kw,kf. (259925)
- 24 childbirth\*.mp,kw,kf. (14074)
- 25 child-birth\*.mp,kw,kf. (491)
- 26 deliver\*.mp,kw,kf. (474171)
- 27 puerper\*.mp,kw,kf. (21074)
- 28 breastfed.tw,kw,kf. (3524)
- 29 mtct.tw,kw,kf. (559)
- 30 pmtct.tw,kw,kf. (725)
- 31 (vertical adj2 transmission\*).tw,kw,kf. (4511)
- 32 f?etus\*.mp,kw,kf. (137278)
- 33 f?etal.mp,kw,kf. (302029)

- 34 (breast adj2 fed\*).tw,kw,kf. (5276)
- 35 in-utero.tw,kw,kf. (20490)
- 36 (intrauterine or intra-uterine).tw,kw,kf. (42420)
- 37 (trans-placent\* or transplacent\*).tw,kw,kf. (5212)
- 38 (f?eto-maternal or f?etomaternal).tw,kw,kf. (2682)
- 39 (parent\* adj2 (child\* or infant\* or baby or babies or neonat\* or newborn\*)).tw,kw,kf. (28605)
- 40 mother\*.tw,kw,kf. (147803)
- 41 (nursing adj2 (infant\* or baby or babies or neonat\* or newborn\*)).tw,kw,kf. (1319)
- 42 (prenatal\* or pre-natal\*).tw,kw,kf. (70920)
- 43 (perinatal\* or peri-natal\*).tw,kw,kf. (51747)
- 44 (post-natal\* or postnatal\*).tw,kw,kf. (85370)
- 45 (antenatal\* or antenatal\*).tw,kw,kf. (23135)
- 46 (antepartum\* or ante-partum\*).tw,kw,kf. (4566)
- 47 (postpartum\* or post-partum\*).tw,kw,kf. (40829)
- 48 maternal\*.tw,kw,kf. (172644)
- 49 or/1-48 (1763167)

#### HIV/AIDS

- 50 exp HIV Infections/ (233689)
- 51 exp HIV/ (83825)
- 52 HIV Long-Term Survivors/ (607)
- 53 AIDS Serodiagnosis/ (6107)
- 54 hiv.mp,kw,kf. (263320)
- 55 Human T-Cell Leukemia Virus.mp,kw,kf. (2850)
- 56 htlv-iii.mp,kw,kf. (1652)
- 57 (acquired adj2 immun\* adj2 (syndrome\* or virus\*)).mp,kw,kf. (86030)
- 58 (human\* adj2 immun\* adj2 deficien\* adj2 virus\*).mp,kw,kf. (491)
- 59 (human\* adj2 immun\* adj2 virus\*).mp,kw,kf. (76929)
- 60 (syndrome\* adj2 lymphadenopath\*).tw,kw,kf. (335)
- 61 slim disease.tw,kw,kf. (25)
- 62 lymphadenopathy-associated virus\*.mp,kw,kf. (295)
- 63 lav-htlv-iii.mp,kw,kf. (211)
- 64 sbl-6669.mp,kw,kf. (16)
- 65 lav-2.mp,kw,kf. (25)
- 66 (acquired adj2 immun\* adj2 deficien\* adj2 syndrome\*).tw,kw,kf. (5057)
- 67 (aids adj10 (disease\* or syndrome\*)).mp,kw,kf. (27876)

68 (aids adj1 related).tw,kw,kf. (6614)  
69 htlv\*.tw,kw,kf. (11427)  
70 hiv###mp,kw,kf. (1760)  
71 or/50-70 (325026)

Patient uptake / dropouts / participation

72 Patient Dropouts/ (6786)  
73 exp "Patient Acceptance of Health Care"/ [includes treatment refusal MeSH] (171083)  
74 exp Consumer Participation/ (32566)  
75 dropout\*.tw,kw,kf. (6483)  
76 (uptake or up-take).tw,kw,kf. (248330)  
77 (drop\* adj1 out\$1).tw,kw,kf. (8228)  
78 (refusal\* or refuse\$1 or refusing).tw,kw,kf. (23366)  
79 (patient\* adj2 (elope or elope\$1 or eloping)).tw,kw,kf. (4)  
80 (non complian\* or noncomplian\*).tw,kw,kf. (9990)  
81 complian\*.tw,kw,kf. (84306)  
82 (uncooperat\* or unco-operat\* or un-co-operat\*).tw,kw,kf. (1028)  
83 (cooperat\* or co-operat\*).tw,kw,kf. (102475)  
84 (non-accept\* or nonaccept\*).tw,kw,kf. (592)  
85 accept\*.tw,kw,kf. (279089)  
86 (nonparticipat\* or non-participat\*).tw,kw,kf. (1298)  
87 participat\*.tw,kw,kf. (322007)  
88 (nonadher\* or non-adher\*).tw,kw,kf. (10638)  
89 adher\*.tw,kw,kf. (114637)  
90 (retain\* or retention\*).tw,kw,kf. (244370)  
91 (non-attend\* or nonattend\*).tw,kw,kf. (1453)  
92 attend\*.tw,kw,kf. (110407)  
93 (comply\* or complies or complian\*).tw,kw,kf. (91550)  
94 (non-comply\* or noncomply\* or non-complian\* or noncomplian\*).tw,kw,kf. (10004)  
95 reluctan\*.tw,kw,kf. (8504)  
96 ((healthcare or care or advice or medical or information) adj3 seek\$3).tw,kw,kf. (15252)  
97 (disengag\* or dis-engag\*).tw,kw,kf. (2812)  
98 engag\*.tw,kw,kf. (82419)  
99 avoid\*.tw,kw,kf. (237366)  
100 ut.fs. (144195)  
101 ignor\*.tw,kw,kf. (27215)  
102 reject\*.tw,kw,kf. (82472)

- 103 (non-embrac\* or nonembrac\*).tw,kw,kf. (0)
- 104 (un-embrac\* or unembrac\*).tw,kw,kf. (1)
- 105 (embrace\* or embracing).tw,kw,kf. (7691)
- 106 (un-accept\* or unaccept\*).tw,kw,kf. (14546)
- 107 (unadher\* or un-adher\*).tw,kw,kf. (14)
- 108 no-show\*.tw,kw,kf. (484)
- 109 (follow\* adj1 up).tw,kw,kf. (638770)
- 110 incent\*.tw,kw,kf. (17823)
- 111 enabl\*.tw,kw,kf. (214935)
- 112 disincent\*.tw,kw,kf. (859)
- 113 utiliz\*.tw,kw,kf. (319558)
- 114 (inclin\* or disinclin\*).tw,kw,kf. (12034)
- 115 or/72-114 (2984236)

Study type / characteristics

- 116 randomized controlled trial.pt. (387105)
- 117 exp Randomized controlled trial/ (387132)
- 118 exp Randomized Controlled Trials as Topic/ (97414)
- 119 clinical trial.pt. (490674)
- 120 Double-Blind Method/ (128228)
- 121 Placebos/ (32662)
- 122 clinical trials as topic/ (171490)
- 123 evaluation research/ (119973)
- 124 program evaluation/ (47548)
- 125 Feasibility Studies/ (45412)
- 126 Pilot Projects/ (85700)
- 127 Evaluation Studies as Topic/ (119973)
- 128 Cost-Benefit Analysis/ (61646)
- 129 (random\* or non-random\* or unrandom\* or nonrandom\*).mp,kw,kf. (874470)
- 130 placebo\*.mp,kw,kf. (168179)
- 131 rct\*1.tw,kw,kf. (17367)
- 132 ((singl\* or doubl\* or trebl\* or tripl\*) adj1 (mask\* or blind\* or dumm\*)).mp,kw,kf. (176744)
- 133 evaluat\*.mp,kw,kf. (2416275)
- 134 effectiv\*.mp,kw,kf. (1149619)
- 135 sustainab\*.mp,kw,kf. (23041)
- 136 feasib\*.mp,kw,kf. (177882)
- 137 appropriateness.mp,kw,kf. (12458)

- 138 efficac\*.mp,kw,kf. (507876)  
 139 impact\*.mp,kw,kf. (537916)  
 140 (pilot adj2 (project\* or study or studies)).mp,kw,kf. (103303)  
 141 cost-effectiv\*.mp,kw,kf. (73309)  
 142 (cost\*1 adj2 benefit\*1).mp,kw,kf. (69472)  
 143 (interrupt\* adj2 time).mp,kw,kf. (1224)  
 144 or/116-143 (4705604)

Lower middle income countries

- 145 Developing Countries/ (63034)  
 146 (Imic or Imics or lami countr\*).mp,sh,kf,in,jn,nj,ia,cp,pb. (534)  
 147 ((developing or less\* developed or under developed or underdeveloped or middle income or low\* income or underserved or under served or deprived or poor\*) adj (countr\* or nation? or population? or world)).hw,kf,ti,ab,cp,in,jn,nj,ia,cp,pb,mp. (106086)  
 148 (Afghan\* or Albania\* or Algeria\* or Angola\* or Antigua\* or Barbud\* or Argentin\* or Armenia\* or Aruba\* or Azerbaijan\* or Bahrain\* or Bangladesh\* or Barbad\* or Benin\* or Byelarus\* or Byelorus\* or Belarus\* or Belorus\* or Beliz\* or Bhutan\* or Bolivia\* or Bosnia\* or Herzegovin\* or Hercegovin\* or Botswan\* or Brasil\* or Brazil\* or Bulgaria\* or Burkina Faso\* or Burkina Fasso\* or Upper Volta\* or Burundi\* or Urundi\* or Cambodia\* or Khmer Republic or Kampuchea\* or Cameroon\* or Cameron\* or Cape Verde\* or Central African Republic or Chad\* or Chile\* or China or chinese or Colombia\* or Comoros\* or Comoro Islands or Comores or Mayott\* or Congo\* or Zair\* or Costa Rica\* or Cote d'Ivoire or Ivory Coast or Croatia\* or Cuba\* or Cyprus or cyprian or Czechoslovakia\* or Czech Republic or Slovakia\* or Slovak Republic or Djibouti\* or French Somaliland or Dominica\* or East Timor or East Timur or Timor Leste or Ecuador\* or Egypt\* or United Arab Republic or El Salvador\* or Eritrea\* or Estonia\* or Ethiopia\* or Fiji\* or Gabon\* or Gambia\* or Gaza\* or Georgia Republic or Georgian Republic or georgian or Ghana\* or Gold Coast or Greece or greek or Grenada\* or Guatemala\* or Guinea\* or Guam\* or Guiana\* or Guyana\* or Haiti\* or Hondura\* or Hungar\* or India\* or Maldiv\* or Indonesia\* or Iran\* or Iraq\* or Isle of Man or Jamaica\* or Jordan\* or Kazakh\* or Kenya\* or Kiribati\* or Korea\* or Kosovo\* or Kyrgyz\* or Kirghiz\* or Kirgiz\* or Lao PDR or Laos\* or Latvia\* or Leban\* or Lesotho\* or Basutoland or Liberia\* or Libya\* or Lithuania\* or Macedonia\* or Madagascar\* or Malagasy Republic or Malay\* or Sabah\* or Sarawak\* or Malawi\* or Nyasaland\* or Mali\* or Malta\* or Marshall Island\* or Maurit\* or Agalega Island\* or Mexic\* or Micronesia\* or Middle East\* or Moldova\* or Moldovia\* or Mongolia\* or Montenegr\* or Morocc\* or Ifni\* or Mozambiq\* or Myanmar\* or Myanma or Burma\* or Namibia\* or Nepal\* or Netherlands Antill\* or New Caledonia\* or Nicaragua\* or Niger\* or Northern Mariana Island\* or Oman\* or Muscat\* or Pakistan\* or Palau\* or Palestin\* or Panama\* or Paragua\* or Peru\* or Phi?lippin\* or Poland or polish or Portug\* or Puerto Ric\* or Romania\* or Rumania\* or

Roumania\* or Russia\* or Rwanda\* or Ruanda\* or Saint Kitts\* or St Kitts or Nevis\* or Saint Lucia\* or St Lucia\* or Saint Vincent\* or St Vincent\* or Grenadin\* or Samoa\* or Navigator Island\* or Sao Tome\* or Saudi Arabia\* or saudi or Senegal\* or Serbia\* or Montenegr\* or Seychelles or Sierra Leone or Slovenia\* or Sri Lanka\* or Ceylon\* or Solomon Islands or Somalia\* or South Africa\* or Sudan\* or Surinam\* or Swaziland or swazi or Syria\* or Tajik\* or Tadjik\* or Tadjhik\* or Tanzania\* or Thailand or thai or Togo or Togolese Republic or Tonga\* or Trinidad\* or Tobag\* or Tunisia\* or Turkey or turkish or Turkmenistan\* or Turkmen\* or Uganda\* or Ukrain\* or Urugua\* or USSR or Soviet Union or Union of Soviet Socialist Republics or Uzbek\* or Vanuat\* or New Hebrides or Venezuela\* or Vietnam\* or Viet Nam\* or West Bank or Yemen\* or Yugoslavia\* or Zambia\* or Zimbabw\* or Rhodesia\* or cabo verd\*).hw,kf,ti,ab,cp,in,jn,nj,ia,cp,pb,mp. (4641336)  
149 or/145-148 (4677916)

Full topic

150 49 and 71 and 115 and 144 and 149 (3309)

151 exp animals/ not (exp animals/ and exp humans/) (4003250)

Full topic minus animal-only studies

152 150 not 151 (3291)

\*\*\*\*\*
