# Supplementary material
Source: HighWire-hosted journal article supplement (https://bmjopen.bmj.com/content/9/7/e024907)
Supplement: inline-supplementary-material-3 [file inline-supplementary-material-3.pdf]

### Risk of Bias within included studies

| Study                 | Random Sequence Generation | Allocation Concealment | Blinding of Participants and Personnel | Blinding of Outcome Assessment | Incomplete Outcome Data | Selective Outcome Reporting |
|-----------------------|----------------------------|------------------------|----------------------------------------|--------------------------------|-------------------------|-----------------------------|
| Aliyu; 2016           | Low                        | Unclear                | High                                   | High                           | Low                     | Low                         |
| Dryden-Peterson; 2015 | Unclear                    | Low                    | High                                   | High                           | High                    | Low                         |
| Ezeanolue; 2015       | Low                        | Low                    | High                                   | Unclear                        | High                    | Low                         |
| Geelhoed; 2013        | Unclear                    | Unclear                | Unclear                                | Unclear                        | High                    | High                        |
| Kieffer; 2011         | Low                        | Unclear                | High                                   | Unclear                        | High                    | Unclear                     |
| Killam; 2010          | Unclear                    | High                   | High                                   | Unclear                        | High                    | Unclear                     |
| Mwapasa; 2017         | Low                        | Unclear                | High                                   | Unclear                        | High                    | Low                         |
| Odeny; 2014           | Low                        | Low                    | High                                   | Unclear                        | Low                     | Unclear                     |
| Oyedun; 2017          | Low                        | Unclear                | High                                   | Unclear                        | High                    | Unclear                     |
| Phiri; 2017           | Unclear                    | High                   | High                                   | Low                            | Low                     | Low                         |
| Reynolds; 2010        | Unclear                    | Unclear                | High                                   | High                           | High                    | Unclear                     |
| Richter; 2014         | Unclear                    | High                   | High                                   | High                           | High                    | Low                         |
| Rotheram-Borus; 2014  | Unclear                    | Unclear                | High                                   | High                           | Unclear                 | Low                         |
| Rustagi; 2016         | Low                        | Unclear                | Unclear                                | Unclear                        | Unclear                 | Low                         |
| Tomlinson; 2014       | Low                        | Unclear                | High                                   | Low                            | Low                     | Low                         |
| Turan; 2015           | Low                        | High                   | High                                   | High                           | High                    | Low                         |
| Weiss; 2014           | Unclear                    | Unclear                | Unclear                                | Unclear                        | Unclear                 | High                        |
| Yotebieng; 2016       | Low                        | Unclear                | High                                   | High                           | High                    | High                        |
